# Supplementary material for: An 8 minute colorimetric paper-based reverse phase vertical flow serum microarray for screening of hyper IgE syndrome
Source: Royal Society of Chemistry journal article supplement (doi:10.1039/c5an01013f), 2015-01-01
Supplement: c5an01013f1.pdf [file c5an01013f1.pdf]

Electronic Supplementary Material (ESI) for Analyst

## A 8-minute colorimetric paper-based reverse phase vertical flow serum microarray for screening of Hyper IgE syndrome

Philippa Reuterswård, Jesper Gantelius and Helene Andersson Svahn

*Division of Proteomics and Nanobiotechnology, Science for Life Laboratory,  
KTH Royal Institute of Technology, Sweden*

Address correspondence to:  
Prof. Helene Andersson Svahn  
Division of Proteomics and Nanobiotechnology  
KTH Royal Institute of Technology  
Science for Life Laboratory  
Box 1031  
SE-171 65 Solna  
Sweden  
Tel: +46852480096  
Email: [helene.andersson.svahn@scilifelab.se](mailto:helene.andersson.svahn@scilifelab.se)

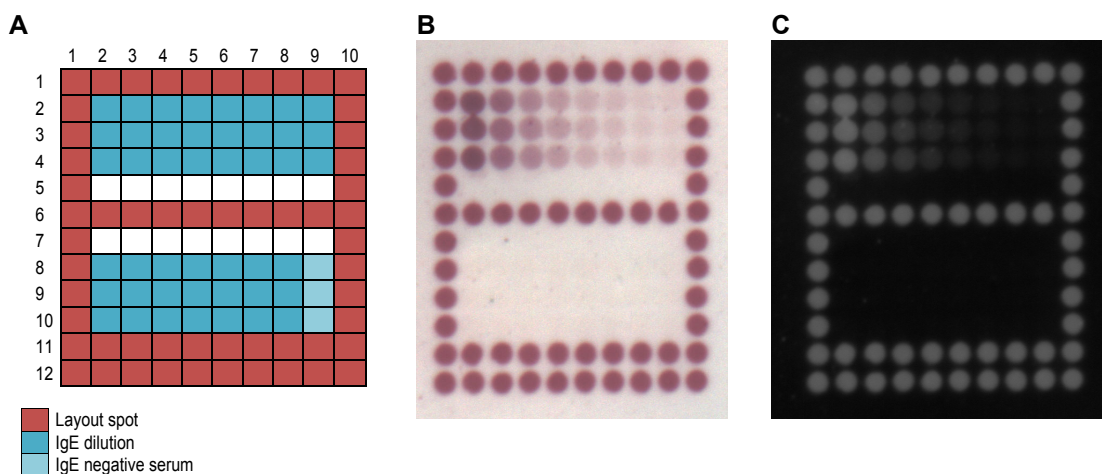

### Supplementary Figure 1. IgE dilution array

1A) Layout of the IgE dilution array and sample orientation. Red spots are layout spots. Blue spots are serum samples spiked with IgE in dilution series and the light blue sample is IgE negative serum without spiked IgE. 1B) Color scan of the IgE dilution array of the same array at optimized conditions. 1C) Inverted image of the IgE serum array used for image analysis.

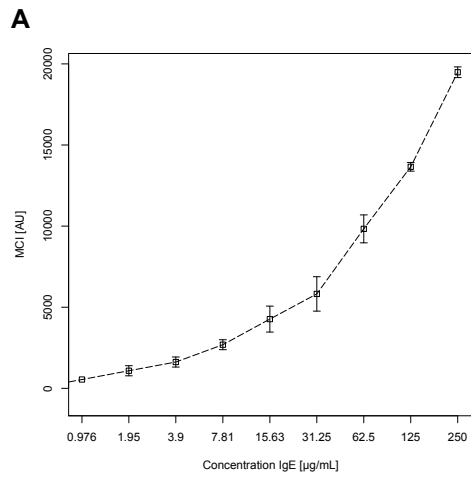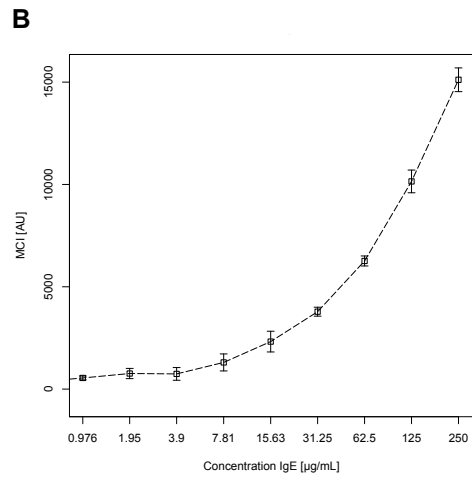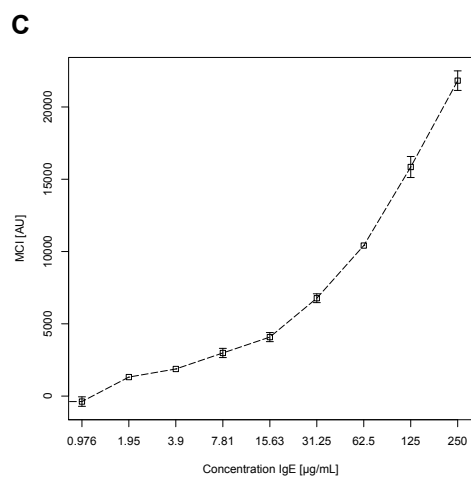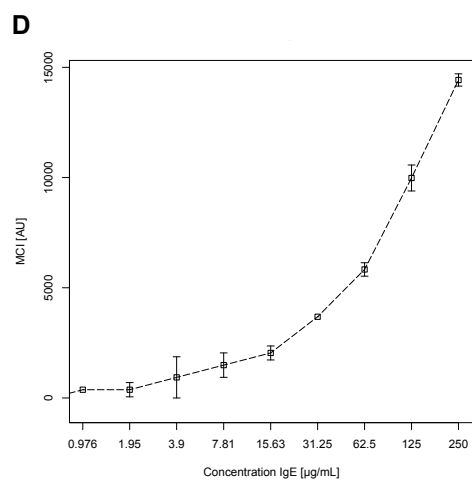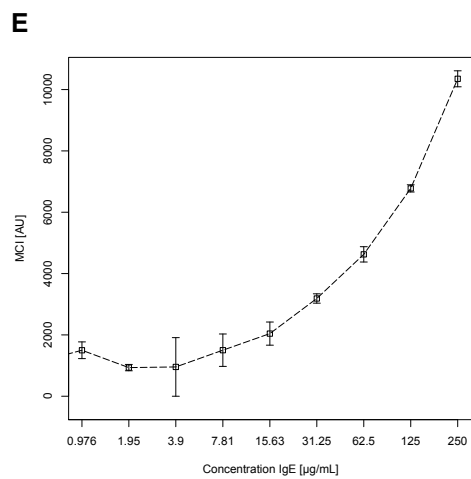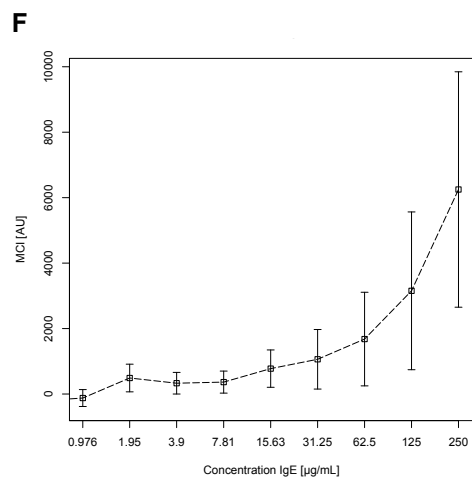

**Supplementary Figure 2. Variability gold nanoparticle dilution**

2A) Variability no gold nanoparticle dilution. 2B) Variability 1:2 nanoparticle dilution.  
 2C) Variability 1:4 gold nanoparticle dilution. 2D) Variability 1:6 gold nanoparticle dilution.  
 2E) Variability 1:8 gold nanoparticle dilution. 2F) Variability 1:10 gold nanoparticle dilution.

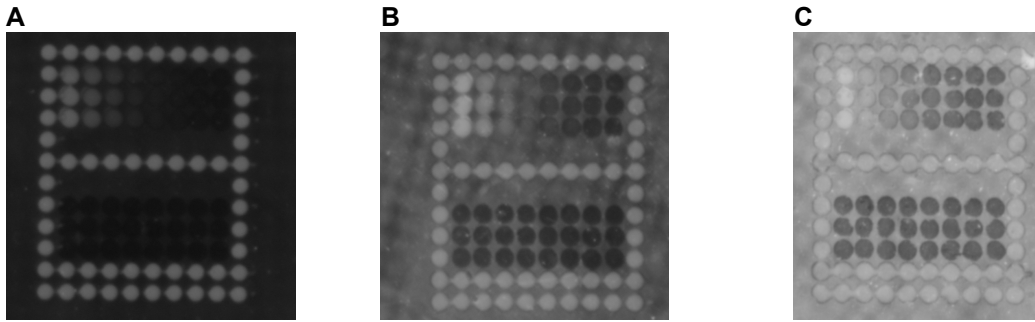

**Supplementary Figure 3. IgE serum array with different assay times**  
 Inverted colorimetric scan in black and white of the IgE array assay run. A) 2 minutes total assay time. B) 5 minutes total assay time. C) 10 minutes total assay time.

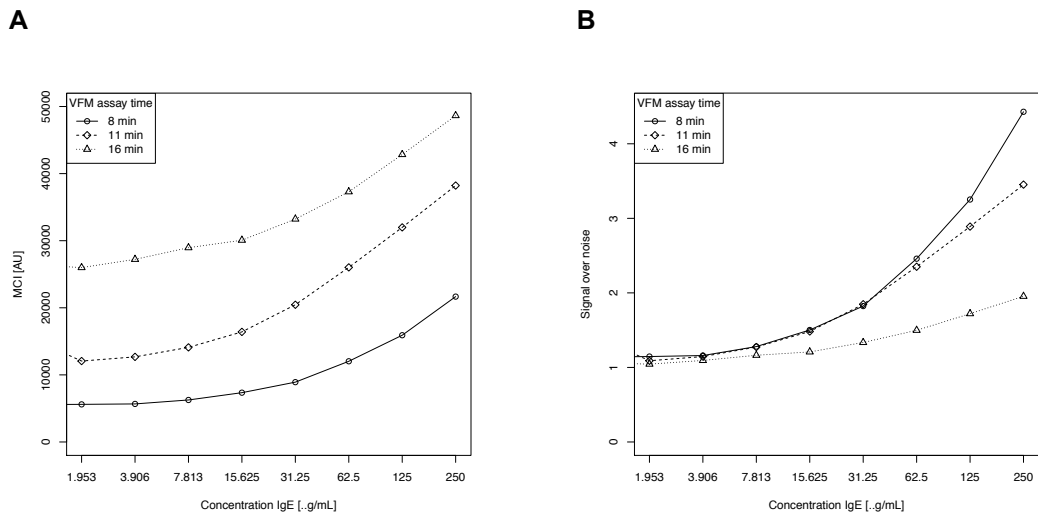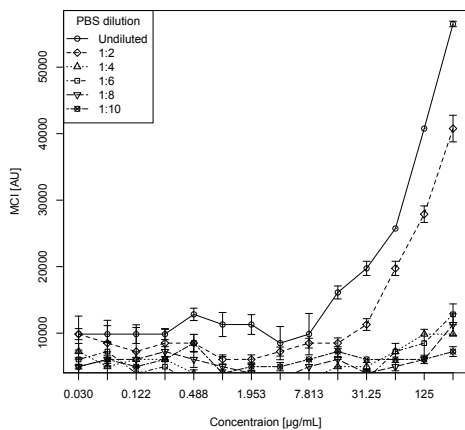

**Supplementary Figure 5. IgE dilution in serum and PBS**  
 MCI signal intensity of the IgE serum dilution in PBS.

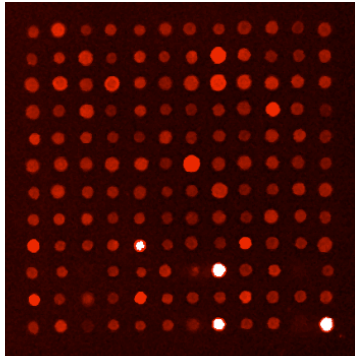

**Supplementary Figure 6. Unisart array**

Fluorescent scan of the Unisart serum array for the 113 serum samples including dilutions of IgE and control spots.

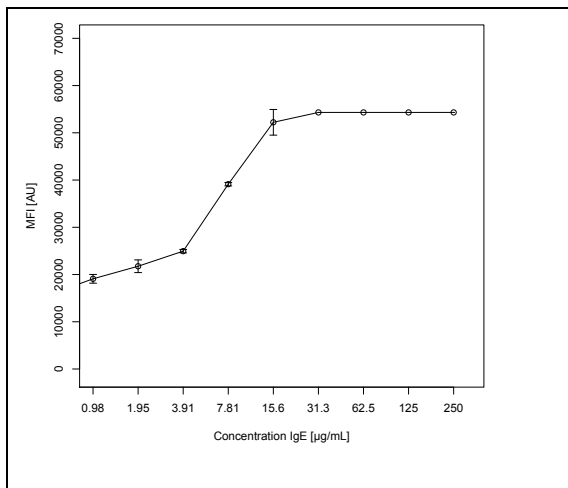

**Supplementary Figure 7. MFI IgE dilution**

Intensity of the IgE serum dilution series from the Unisart reference array.

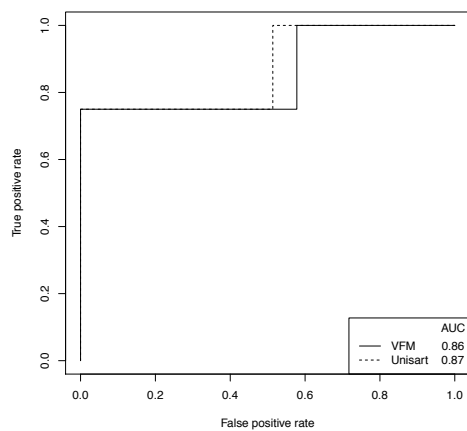

**Supplementary Figure 8. ROC curves**

ROC curves for VFM showed an AUC of 0.86 and the Unisart array showed an AUC of 0.87.
